# Supplementary material
Source: Elsevier journal article supplement (https://www.sciencedirect.com/science/article/pii/S1134793720300300)
Supplement: mmc2 [file S1134793720300300:mmc2.docx]

Appendix B

Data Extraction Form

#
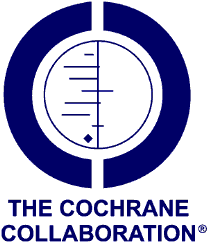
Data collection form

Intervention review

| **Review title or ID** |
| --- |
| ARE COGNITIVE BEHAVIOURAL INTERVENTIONS EFFECTIVE IN IMPROVING OUTCOMES IN ADULTS WITH LONG-TERM CONDITIONS AND MEDICALLY UNEXPLAINED SYMPTOMS? A SYSTEMATIC REVIEW |

| **Study ID** *(surname of first author and year first full report of study was published, e.g., Smith 2001)* |
| --- |
|  |

| **Report IDs of other reports of this study** *(e.g., duplicate publications, follow-up studies)* |
| --- |
|  |

| **Notes:** |
| --- |

## General Information

| **Date form completed** *(dd/mm/yyyy)* |  |
| --- | --- |
| **Name/ID of person extracting data** |  |
| **Report title**  *(title of paper/ abstract/ report that data are extracted from)* |  |
| **Report ID**  *(ID for this paper/ abstract/ report)* |  |
| **Reference details** |  |
| **Report author contact details** |  |
| **Publication type**  *(e.g., full report, abstract, letter)* |  |
| **Study funding sources**  *(including role of funders)* |  |
| **Possible conflicts of interest**  *(for study authors)* |  |
| **Notes:** | |

## Study Eligibility

| **Study Characteristics** |  | | Yes | No | Unclear | **Location in text**  *(pg & ¶/fig/table)* |
| --- | --- | --- | --- | --- | --- | --- |
| **Type of study** |  | |  |  |  |  |
|  |  | |  |  |  |  |
| **Participants** |  | |  |  |  |  |
| **Types of intervention** |  | |  |  |  |  |
| **Types of outcome measures** |  | |  |  |  |  |
| **INCLUDE** | | **EXCLUDE** | | | | |
| **Reason for exclusion** |  | | | | | |
| **Notes:** | | | | | | |

DO NOT PROCEED IF STUDY EXCLUDED FROM REVIEW

## Population and setting

|  | **Description**  *Include comparative information for each group (i.e., intervention and controls) if available* | | **Location in text**  *(pg & ¶/fig/table)* |
| --- | --- | --- | --- |
| **Population description**  *(from which study participants are drawn)* |  | |  |
| **Setting**  *(including location and social context)* |  | |  |
| **Inclusion criteria** |  | |  |
| **Exclusion criteria** |  | |  |
| **Method/s of recruitment of participants** |  | |  |
| **Informed consent obtained** | YesNoUnclear |  |  |
| **Notes:** | | | |

## Methods

|  | **Descriptions as stated in report/paper** | | **Location in text**  *(pg & ¶/fig/table)* |
| --- | --- | --- | --- |
| **Aim of study** |  | |  |
| **Design** *(e.g. parallel, crossover, cluster)* |  | |  |
| **Unit of allocation**  *(by individuals, cluster/ groups or body parts)* |  | |  |
| **Start date** |  | |  |
| **End date** |  | |  |
| **Total study duration** |  | |  |
| **Ethical approval needed/ obtained for study** | YesNoUnclear |  |  |
| **Notes:** | | | |

## Participants

*Provide overall data and, if available, comparative data for each intervention or comparison group.*

|  | **Description as stated in report/paper** | **Location in text**  (pg & ¶/fig/table) |
| --- | --- | --- |
| **Total no. randomised**  *(or total pop. at start of study for NRCTs)* |  |  |
| **Clusters**  *(if applicable, no., type, no. people per cluster)* |  |  |
| **Baseline imbalances** |  |  |
| **Withdrawals and exclusions**  *(if not provided below by outcome)* |  |  |
| **Age** |  |  |
| **Sex** |  |  |
| **Race/Ethnicity** |  |  |
| **Severity of illness** |  |  |
| **Co-morbidities** |  |  |
| **Other treatment received** *(additional to study intervention)* |  |  |
| **Other relevant sociodemographics** |  |  |
| **Subgroups measured** |  |  |
| **Subgroups reported** |  |  |
| **Notes:** | | |

## Intervention groups

*Copy and paste table for each intervention and comparison group*

**Intervention Group 1**

|  | **Description as stated in report/paper** | **Location in text**  *(pg & ¶/fig/table)* |
| --- | --- | --- |
| **Group name** |  |  |
| **No. randomised to group**  *(specify whether no. people or clusters)* |  |  |
| **Theoretical basis** *(include key references)* |  |  |
| **Description** *(include sufficient detail for replication, e.g. content, dose, components)* |  |  |
| **Duration of treatment period** |  |  |
| **Timing** *(e.g. frequency, duration of each episode)* |  |  |
| **Delivery** *(e.g. mechanism, medium, intensity, fidelity)* |  |  |
| **Providers**  *(e.g. no., profession, training, ethnicity etc. if relevant)* |  |  |
| **Co-interventions** |  |  |
| **Economic variables** *(i.e. intervention cost, changes in other costs as result of intervention)* |  |  |
| **Resource requirements to replicate intervention**  *(e.g. staff numbers, cold chain, equipment)* |  |  |
| **Notes:** | | |

## Outcomes

*Copy and paste table for each outcome.*

**Outcome 1**

|  | **Description as stated in report/paper** | | **Location in text**  *(pg & ¶/fig/table)* |
| --- | --- | --- | --- |
| **Outcome name** |  | |  |
| **Time points measured** |  | |  |
| **Time points reported** |  | |  |
| **Outcome definition** *(with diagnostic criteria if relevant)* |  | |  |
| **Person measuring/reporting** |  | |  |
| **Unit of measurement**  *(if relevant)* |  | |  |
| **Scales: upper and lower limits** *(indicate whether high or low score is good)* |  | |  |
| **Is outcome/tool validated?** | YesNoUnclear |  |  |
| **Imputation of missing data** *(e.g. assumptions made for ITT analysis)* |  | |  |
| **Assumed risk estimate**  (*e.g. baseline or population risk noted in Background)* |  | |  |
| **Power** |  | |  |
| **Notes:** | | | |

## Results

*Copy and paste the appropriate table for each outcome, including additional tables for each time point and subgroup as required.*

***Continuous outcome***

|  | | **Description as stated in report/paper** | | | | | | | **Location in text**  *(pg & ¶/fig/table)* | |
| --- | --- | --- | --- | --- | --- | --- | --- | --- | --- | --- |
| **Comparison** | |  | | | | | | |  | |
| **Outcome** | |  | | | | | | |  | |
| **Subgroup** | |  | | | | | | |  | |
| **Timepoint** *(specify whether from start or end of intervention)* | |  | | | | | | |  | |
| **Post-intervention or change from baseline?** | |  | | | | | | |  | |
| **Results** | **Intervention** | | | | | **Comparison** | | |  | |
| Mean | | SD (or other variance) | No. participants | | Mean | SD (or other variance) | No. participants |  | |
|  | |  |  | |  |  |  |
| **No. missing participants and reasons** | |  | | | |  | | |  | |
|  | |  | | | |  | | |  | |
| **No. participants moved from other group and reasons** | |  | | | |  | | |  | |
| **Any other results reported** | |  | | | | | | |  | |
| **Unit of analysis**  *(individuals, cluster/ groups or body parts)* | |  | | | | | | |  | |
| **Statistical methods used and appropriateness of these methods** *(e.g. adjustment for correlation)* | |  | | | | | | |  | |
| **Reanalysis required?** *(specify)* | | YesNoUnclear | | |  | | | |  | |
| **Reanalysis possible?** | | YesNoUnclear | | |  | | | |  | |
| **Reanalysed results** | |  | | | | | | |  | |
| **Notes:** | | | | | | | | | |

## Applicability

| **Have important populations been excluded from the study?** *(consider disadvantaged populations, and possible differences in the intervention effect)* | YesNoUnclear |  |
| --- | --- | --- |
| **Is the intervention likely to be aimed at disadvantaged groups?** *(e.g., lower socioeconomic groups)* | YesNoUnclear |  |
| **Does the study directly address the review question?**  *(any issues of partial or indirect applicability)* | YesNoUnclear |  |
| **Notes:** | | |

## Other information

|  | **Description as stated in report/paper** | **Location in text**  *(pg & ¶/fig/table)* |
| --- | --- | --- |
| **Key conclusions of study authors** |  |  |
| **References to other relevant studies** |  |  |
| **Correspondence required for further study information** *(from whom, what and when)* |  | |
| **Notes:** | | |
